# Supplementary material for: Beyond Gender and Race: The Representation of Concealable Identities Among College Science Instructors at Research Institutions
Source: Atypon-hosted journal article supplement (doi:10.1187/cbe.23-09-0170), 2024-04-01
Supplement: combinedsupmats.pdf [file combinedsupmats.pdf]

# Supplemental Material

*CBE—Life Sciences Education*

Busch *et al.*

**Supplemental Material for**

Beyond gender and race: The representation of concealable identities among college science instructors at research institutions

Carly A. Busch, Tala Araghi, Jingyi He, Katelyn M. Cooper<sup>1</sup>, Sara E. Brownell<sup>1\*</sup>

<sup>1</sup>These authors contributed equally to this work.

\*Sara E. Brownell

Email: sara.brownell@asu.edu

**This PDF file includes:**

Tables S1 to S8

Legends for Datasets S1 to S4 available in the GitHub repository

Supplemental References

**Table S1.** Questionnaire items for science instructors, separated by pertinent research question; in instances where the text in the table is in brackets (< >), the item was updated to reference the participant’s specific identity. If the participant reported more than one CSI, they received parallel questions for each identity.

| <b>RQ1. To what extent do science instructors hold CSIs?</b> |                                                                                                                    |                                                                                                                            |
|--------------------------------------------------------------|--------------------------------------------------------------------------------------------------------------------|----------------------------------------------------------------------------------------------------------------------------|
| <i>Identities of interest</i>                                | Do you identify as a member of the LGBTQ+ community?                                                               | Yes                                                                                                                        |
|                                                              |                                                                                                                    | No                                                                                                                         |
|                                                              |                                                                                                                    | Decline to state                                                                                                           |
|                                                              | [If yes LGBTQ+] Please select the word or words that best describe your identity(ies) within the LGBTQ+ community. | Lesbian or Gay                                                                                                             |
|                                                              |                                                                                                                    | Bisexual                                                                                                                   |
|                                                              |                                                                                                                    | Queer as it relates to my sexuality                                                                                        |
|                                                              |                                                                                                                    | Asexual                                                                                                                    |
|                                                              |                                                                                                                    | Pansexual                                                                                                                  |
|                                                              |                                                                                                                    | Transgender man                                                                                                            |
|                                                              |                                                                                                                    | Transgender woman                                                                                                          |
|                                                              |                                                                                                                    | Genderqueer or gender nonbinary                                                                                            |
|                                                              |                                                                                                                    | An identity not listed, please describe                                                                                    |
|                                                              |                                                                                                                    | Decline to state                                                                                                           |
|                                                              | I most closely identify as                                                                                         | Someone who has or has had depression                                                                                      |
|                                                              |                                                                                                                    | Someone who does not have depression                                                                                       |
|                                                              |                                                                                                                    | Decline to state                                                                                                           |
|                                                              | I most closely identify as                                                                                         | Someone who has or has had anxiety                                                                                         |
|                                                              |                                                                                                                    | Someone who does not have anxiety                                                                                          |
|                                                              |                                                                                                                    | Decline to state                                                                                                           |
|                                                              | I most closely identify as                                                                                         | Growing up in a low-income household                                                                                       |
|                                                              |                                                                                                                    | Growing up in a middle-income household                                                                                    |
|                                                              |                                                                                                                    | Growing up in a upper-income household                                                                                     |
|                                                              |                                                                                                                    | Decline to state                                                                                                           |
|                                                              | I most closely identify as                                                                                         | Someone who has or has had an addiction to drugs or alcohol                                                                |
|                                                              |                                                                                                                    | Someone who has not had an addiction to drugs or alcohol                                                                   |
|                                                              |                                                                                                                    | Decline to state                                                                                                           |
|                                                              | I most closely identify as                                                                                         | A first-generation college student                                                                                         |
|                                                              |                                                                                                                    | A non-first-generation college student (at least one of my parents or guardians has a bachelor's degree or equivalent)     |
|                                                              |                                                                                                                    | Decline to state                                                                                                           |
|                                                              | I most closely identify as                                                                                         | Someone who struggled academically in college                                                                              |
|                                                              |                                                                                                                    | Someone who did not struggle academically in college                                                                       |
|                                                              |                                                                                                                    | Decline to state                                                                                                           |
|                                                              | I most closely identify as                                                                                         | Having a disability                                                                                                        |
|                                                              |                                                                                                                    | Not having a disability                                                                                                    |
|                                                              |                                                                                                                    | Decline to state                                                                                                           |
|                                                              | Which option most closely reflects your                                                                            | I transferred to a 4-year institution from a 2-year college, a community college, a junior college, or a technical college |
|                                                              |                                                                                                                    | I transferred to a 4-year institution from another 4-year institution                                                      |

|                                                                                            |                                                                                                                                                                                       |                                                                                                                                                 |
|--------------------------------------------------------------------------------------------|---------------------------------------------------------------------------------------------------------------------------------------------------------------------------------------|-------------------------------------------------------------------------------------------------------------------------------------------------|
|                                                                                            | undergraduate college experience?                                                                                                                                                     | I started my college career at the same 4-year institution from which I graduated                                                               |
|                                                                                            |                                                                                                                                                                                       | If none of the above reflect your experience, please describe                                                                                   |
|                                                                                            |                                                                                                                                                                                       | Decline to state                                                                                                                                |
| <i>Perceived concealable</i>                                                               | Do you perceive that your <identity> is concealable; that is that people may not know that you identify this way unless you tell them?                                                | Yes, people may not know I identify this way                                                                                                    |
|                                                                                            |                                                                                                                                                                                       | No                                                                                                                                              |
| <b>RQ2. To what extent are science instructors revealing their CSIs to undergraduates?</b> |                                                                                                                                                                                       |                                                                                                                                                 |
| <i>Extent of reveal</i>                                                                    | Considering the last time you taught the science course you indicated earlier in the survey, to what extent did you reveal your <identity> to undergraduates enrolled in that course? | I reveal this identity to all undergraduates in this course (e.g., I reveal my identity to the whole class).                                    |
|                                                                                            |                                                                                                                                                                                       | I reveal this identity to some undergraduates in this course (e.g., during office hours).                                                       |
|                                                                                            |                                                                                                                                                                                       | I do not reveal this identity to undergraduates in this course.                                                                                 |
| <b>RQ4. What are the primary reasons why instructors conceal or reveal their CSIs?</b>     |                                                                                                                                                                                       |                                                                                                                                                 |
| <i>Reasons to conceal identity</i>                                                         | Please select all of the factors that influenced your decision to conceal your <identity> from some or all undergraduates in this course.                                             | I typically do not share my <identity> with others.                                                                                             |
|                                                                                            |                                                                                                                                                                                       | I did not feel my <identity> was relevant to the course content.                                                                                |
|                                                                                            |                                                                                                                                                                                       | I had never thought about revealing my <identity> to all students in this course.                                                               |
|                                                                                            |                                                                                                                                                                                       | I did not feel my <identity> was relevant to the students in this course.                                                                       |
|                                                                                            |                                                                                                                                                                                       | I did not feel like I had a personal enough relationship with the students in this course.                                                      |
|                                                                                            |                                                                                                                                                                                       | I thought revealing my <identity> to all undergraduates in this course was inappropriate.                                                       |
|                                                                                            |                                                                                                                                                                                       | I was concerned students would have a negative opinion about my <identity>.                                                                     |
|                                                                                            |                                                                                                                                                                                       | I did not know others in the department, such as other faculty or instructors, who had revealed a similar identity to people in the department. |
|                                                                                            |                                                                                                                                                                                       | I was concerned that revealing my <identity> would waste class time.                                                                            |
|                                                                                            |                                                                                                                                                                                       | I was concerned that revealing my <identity> would result in poor course evaluations.                                                           |
|                                                                                            |                                                                                                                                                                                       | I was concerned that I would be subjected to departmental disciplinary action for revealing my <identity>.                                      |
|                                                                                            |                                                                                                                                                                                       | I was concerned I could be fired for revealing my <identity>.                                                                                   |
| <i>Reasons to reveal identity</i>                                                          | Please select all of the factors that influenced your decision to reveal your <identity> to all undergraduates in this course.                                                        | I wanted to be an example to my students of someone who <holds this identity>.                                                                  |
|                                                                                            |                                                                                                                                                                                       | I wanted to be known as a supporter of individuals who also <hold this identity>.                                                               |
|                                                                                            |                                                                                                                                                                                       | I felt that revealing my <identity> to students in this course was appropriate.                                                                 |

|  |  |                                                                                                                                          |
|--|--|------------------------------------------------------------------------------------------------------------------------------------------|
|  |  | I felt my <identity> was relevant to the students in this course.                                                                        |
|  |  | I wanted to serve as a mentor to students <with this identity>.                                                                          |
|  |  | I thought revealing my <identity> could make students more comfortable.                                                                  |
|  |  | I thought revealing my <identity> could make me more relatable to students.                                                              |
|  |  | I prefer to live authentically or be open with others about my <identity>.                                                               |
|  |  | I typically share my <identity> with people.                                                                                             |
|  |  | I thought I could better engage students in the course material by making a connection between my <identity> and the course content.     |
|  |  | I thought revealing my <identity> could help students understand me or my circumstances better.                                          |
|  |  | I felt like I had a personal relationship with the students in the course.                                                               |
|  |  | I felt my <identity> was relevant to the course content.                                                                                 |
|  |  | I knew others in the department, such as other faculty or instructors, who have revealed a similar identity to people in the department. |

**Table S2.** Evidence-based justification for including each identity as a concealable stigmatized identity.

| <b>Identity</b>                    | <b>Evidence as a concealable stigmatized identity</b>                                                                                                                                                                                                                                                                                                                                                                                                                                                     |
|------------------------------------|-----------------------------------------------------------------------------------------------------------------------------------------------------------------------------------------------------------------------------------------------------------------------------------------------------------------------------------------------------------------------------------------------------------------------------------------------------------------------------------------------------------|
| Anxiety                            | Anxiety is inversely related to persistence in science majors among undergraduates (England et al., 2017, 2019) and is widely considered to be a concealable stigmatized identity in many contexts (Chaudoir & Fisher, 2010; Henning et al., 2019; Quinn et al., 2014; Quinn & Chaudoir, 2009; Quinn & Earnshaw, 2011; Quinn et al., 2009).                                                                                                                                                               |
| First-gen college student          | First-generation college students are less likely than continuing generation students to persist in STEM (Dika & D’Amico, 2016) and the identity is considered concealable (Henning et al., 2019).                                                                                                                                                                                                                                                                                                        |
| Depression                         | Depression functions as a concealable stigmatized identity for undergraduates in research experiences (Cooper et al., 2020) and undergraduates with more depressive symptoms have worse academic performance (DeRoma et al., 2009). Like anxiety, depression is considered a concealable stigmatized identity in many different contexts (Chaudoir & Fisher, 2010; Chaudoir & Quinn, 2010; Henning et al., 2019; Quinn et al., 2014; Quinn & Chaudoir, 2009; Quinn & Earnshaw, 2011; Quinn et al., 2009). |
| Low income growing up              | Growing up in a low-income household is associated with lower likelihood of choosing to pursue a STEM major (Niu, 2017) and is concealable (Henning et al., 2019).                                                                                                                                                                                                                                                                                                                                        |
| Struggled academically in college  | Struggling academically during college is a common reason that undergraduates leave STEM majors (Harris et al., 2020; Ost, 2010; Seymour, 1995; Seymour & Hewitt, 1997) and can carry negative stereotypes in part due to the competitive nature of college science courses (Canning et al., 2020).                                                                                                                                                                                                       |
| LGBQ+                              | LGBQ+ identities are a common example of concealable stigmatized identities in various contexts (Chaudoir & Fisher, 2010; Chaudoir & Quinn, 2010; Henning et al., 2019; Quinn & Chaudoir, 2009; Quinn & Earnshaw, 2011; Quinn et al., 2009) and LGBQ+ undergraduates have lower STEM retention than their straight peers (Hughes, 2018).                                                                                                                                                                  |
| Community college transfer student | Community college transfer students report experiencing transfer shock when making the transition to a four-year institution (Lakin & Elliott, 2016) which may help to explain the lower completion levels of STEM coursework among transfer students compared to undergraduates who remain at a four-year institution for their entire college experience (Bahr et al., 2017).                                                                                                                           |
| Has a disability                   | Students with disabilities have historically been excluded from higher education and frequently experience negative interactions with peers and instructors (Moon et al., 2012) and there are many hidden disabilities that are commonly considered concealable stigmatized identities (Chaudoir & Fisher, 2010; Chaudoir & Quinn, 2010; Quinn & Chaudoir, 2009; Quinn & Earnshaw, 2011; Quinn et al., 2009).                                                                                             |
| Addiction/substance use disorder   | Substance use disorder is inversely related to academic growth (Rattermann, 2014) and is considered a concealable identity with a great amount of stigma associated (Barry et al., 2014; Quinn et al., 2014; Quinn & Chaudoir, 2009; Quinn & Earnshaw, 2011; Quinn et al., 2009).                                                                                                                                                                                                                         |

|                 |                                                                                                                                                                                                                                                                                                                                                                                                                 |
|-----------------|-----------------------------------------------------------------------------------------------------------------------------------------------------------------------------------------------------------------------------------------------------------------------------------------------------------------------------------------------------------------------------------------------------------------|
| Trans/nonbinary | Although gender is often considered to be a visible identity, that is not always the case and considering the prevalence of anti-trans legislation across the country (Trans Legislation Tracker, 2023) coupled with the lower STEM retention of trans and nonbinary undergraduates compared to their cisgender peers (Maloy et al., 2022), we included trans/nonbinary gender identities in the current study. |
|-----------------|-----------------------------------------------------------------------------------------------------------------------------------------------------------------------------------------------------------------------------------------------------------------------------------------------------------------------------------------------------------------------------------------------------------------|

**Table S3.** Questionnaire items for science undergraduates.

| <b>RQ3. How does the prevalence of CSIs among instructors compare to undergraduates?</b>                                                                                                                         |                                                                                                                                                                                      |                                                          |                                                                                      |
|------------------------------------------------------------------------------------------------------------------------------------------------------------------------------------------------------------------|--------------------------------------------------------------------------------------------------------------------------------------------------------------------------------------|----------------------------------------------------------|--------------------------------------------------------------------------------------|
| <i>Identities of interest</i>                                                                                                                                                                                    | Do you identify as a member of the LGBTQ+ community?                                                                                                                                 | Yes                                                      |                                                                                      |
|                                                                                                                                                                                                                  |                                                                                                                                                                                      | No                                                       |                                                                                      |
|                                                                                                                                                                                                                  |                                                                                                                                                                                      | Decline to state                                         |                                                                                      |
|                                                                                                                                                                                                                  | [If yes LGBTQ+] Please select the word or words that best describe your identity(ies) within the LGBTQ+ community.                                                                   |                                                          | Lesbian or Gay                                                                       |
|                                                                                                                                                                                                                  |                                                                                                                                                                                      |                                                          | Bisexual                                                                             |
|                                                                                                                                                                                                                  |                                                                                                                                                                                      |                                                          | Queer as it relates to my sexuality                                                  |
|                                                                                                                                                                                                                  |                                                                                                                                                                                      |                                                          | Asexual                                                                              |
|                                                                                                                                                                                                                  |                                                                                                                                                                                      |                                                          | Pansexual                                                                            |
|                                                                                                                                                                                                                  |                                                                                                                                                                                      |                                                          | Transgender man                                                                      |
|                                                                                                                                                                                                                  |                                                                                                                                                                                      |                                                          | Transgender woman                                                                    |
|                                                                                                                                                                                                                  |                                                                                                                                                                                      |                                                          | Genderqueer or gender nonbinary                                                      |
|                                                                                                                                                                                                                  |                                                                                                                                                                                      |                                                          | An identity not listed, please describe                                              |
|                                                                                                                                                                                                                  |                                                                                                                                                                                      |                                                          | Decline to state                                                                     |
|                                                                                                                                                                                                                  | Please indicate how you most closely identify. You do not need to have a formal diagnosis to identify as currently or previously struggled with depression or a depressive disorder. |                                                          | Currently or having previously struggled with depression or a depressive disorder    |
|                                                                                                                                                                                                                  |                                                                                                                                                                                      |                                                          | Having never struggled with depression                                               |
|                                                                                                                                                                                                                  |                                                                                                                                                                                      |                                                          | Decline to state                                                                     |
|                                                                                                                                                                                                                  | Please indicate how you most closely identify. You do not need to have a formal diagnosis to identify as currently or previously struggled with anxiety or an anxiety disorder.      |                                                          | Currently or having previously struggled with anxiety or an anxiety disorder         |
|                                                                                                                                                                                                                  |                                                                                                                                                                                      |                                                          | Having never struggled with an anxiety disorder                                      |
|                                                                                                                                                                                                                  |                                                                                                                                                                                      |                                                          | Decline to state                                                                     |
|                                                                                                                                                                                                                  | What is your best guess for the yearly income of the household in which you grew up?                                                                                                 |                                                          | Low income (less than \$25,000)                                                      |
|                                                                                                                                                                                                                  |                                                                                                                                                                                      |                                                          | Middle-low income (\$25,000-\$49,999)                                                |
|                                                                                                                                                                                                                  |                                                                                                                                                                                      |                                                          | Middle income (\$50,000-\$99,999)                                                    |
|                                                                                                                                                                                                                  |                                                                                                                                                                                      |                                                          | Middle-high income (\$100,000-\$199,999)                                             |
|                                                                                                                                                                                                                  |                                                                                                                                                                                      |                                                          | High income (\$200,000 or higher)                                                    |
|                                                                                                                                                                                                                  |                                                                                                                                                                                      | Decline to state                                         |                                                                                      |
|                                                                                                                                                                                                                  | I most closely identify as                                                                                                                                                           |                                                          | Someone who has or has had a substance use disorder or addiction to drugs or alcohol |
|                                                                                                                                                                                                                  |                                                                                                                                                                                      |                                                          | Someone who has not had a substance use disorder or addiction to drugs or alcohol    |
|                                                                                                                                                                                                                  |                                                                                                                                                                                      |                                                          | Decline to state                                                                     |
| What is your parent/guardian's highest completed level of education? If you have more than one parent/guardian with differing levels of education, choose the parent/guardian with the highest completion level. |                                                                                                                                                                                      | Did not complete high school                             |                                                                                      |
|                                                                                                                                                                                                                  |                                                                                                                                                                                      | High school diploma or GED                               |                                                                                      |
|                                                                                                                                                                                                                  |                                                                                                                                                                                      | Some college but no degree                               |                                                                                      |
|                                                                                                                                                                                                                  |                                                                                                                                                                                      | Associate degree (for example: AA, AS)                   |                                                                                      |
|                                                                                                                                                                                                                  |                                                                                                                                                                                      | Bachelor's degree (for example: BA, AB, BS)              |                                                                                      |
|                                                                                                                                                                                                                  |                                                                                                                                                                                      | Master's degree (for example: MA, MS, Meng, MSW, MBA)    |                                                                                      |
|                                                                                                                                                                                                                  |                                                                                                                                                                                      | Higher than a Master's degree (for example: PhD, MD, JD) |                                                                                      |



|  |                                                                           |                                                                                                                            |
|--|---------------------------------------------------------------------------|----------------------------------------------------------------------------------------------------------------------------|
|  |                                                                           | Other (please describe)                                                                                                    |
|  |                                                                           | Decline to state                                                                                                           |
|  | <i>I most closely identify as</i>                                         | Someone who struggled academically in college                                                                              |
|  |                                                                           | Someone who did not struggle academically in college                                                                       |
|  |                                                                           | Decline to state                                                                                                           |
|  | Do you identify as having a disability?                                   | Yes                                                                                                                        |
|  |                                                                           | No                                                                                                                         |
|  |                                                                           | Decline to state                                                                                                           |
|  | Which option most closely reflects your undergraduate college experience? | I transferred to a 4-year institution from a 2-year college, a community college, a junior college, or a technical college |
|  |                                                                           | I transferred to a 4-year institution from another 4-year institution                                                      |
|  |                                                                           | I have attended the same 4-year institution for my entire undergraduate experience                                         |
|  |                                                                           | If none of the above reflect your experience, please describe                                                              |
|  |                                                                           | Decline to state                                                                                                           |

**Table S4.** Distribution of instructor and undergraduate participants by state.

| <b>State</b> | <b>%<br/>instructors</b> | <b>%<br/>undergraduates</b> | <b>State</b> | <b>%<br/>instructors</b> | <b>%<br/>undergraduates</b> |
|--------------|--------------------------|-----------------------------|--------------|--------------------------|-----------------------------|
| AL           | 1.3                      | 0.0                         | MS           | 1.6                      | 0.0                         |
| AR           | 0.1                      | 0.0                         | MT           | 0.2                      | 0.0                         |
| AZ           | 8.2                      | 6.9                         | NC           | 3                        | 0.0                         |
| CA           | 10.9                     | 1.4                         | NE           | 1.8                      | 8.3                         |
| CO           | 3.3                      | 0.0                         | NH           | 0.4                      | 0.0                         |
| CT           | 2.2                      | 0.0                         | NJ           | 1                        | 0.0                         |
| DC           | 1.2                      | 0.0                         | NM           | 0.2                      | 0.0                         |
| DE           | 1.1                      | 0.0                         | NV           | 0.6                      | 0.0                         |
| FL           | 4.4                      | 0.0                         | NY           | 3                        | 32.0                        |
| GA           | 1.7                      | 0.0                         | OH           | 2.5                      | 0.2                         |
| HI           | 1.4                      | 0.0                         | OK           | 3                        | 0.0                         |
| IA           | 1.4                      | 2.3                         | OR           | 1.4                      | 32.8                        |
| IL           | 2.9                      | 0.0                         | PA           | 4.7                      | 9.8                         |
| IN           | 2.4                      | 0.0                         | RI           | 0.9                      | 0.0                         |
| KS           | 0.7                      | 0.0                         | SC           | 4.8                      | 1.2                         |
| KY           | 0.5                      | 0.0                         | TN           | 0.7                      | 0.0                         |
| LA           | 0.3                      | 0.0                         | TX           | 4.4                      | 0.0                         |
| MA           | 5.2                      | 0.0                         | UT           | 1.7                      | 0.0                         |
| MD           | 1.7                      | 0.0                         | VA           | 3.5                      | 0.0                         |
| ME           | 0.1                      | 0.0                         | WA           | 2.4                      | 4.8                         |
| MI           | 2.9                      | 0.0                         | WI           | 2.4                      | 0.0                         |
| MN           | 1.1                      | 0.0                         | WV           | 0.3                      | 0.0                         |
| MO           | 0.7                      | 0.0                         |              |                          |                             |

**Table S5.** Distribution of instructor and undergraduate participants by discipline.

| <b>Discipline</b>          | <b>% instructors<br/>(by course subject)</b> | <b>% undergraduates<br/>(by major)</b> |
|----------------------------|----------------------------------------------|----------------------------------------|
| Biology/Life sciences      | 54.3                                         | 33.9                                   |
| Chemistry                  | 15.6                                         | 2.2                                    |
| Geosciences                | 9.3                                          | 1.2                                    |
| Physics                    | 20.8                                         | 0.2                                    |
| Engineering                | NA                                           | 10.9                                   |
| Mathematics and Statistics | NA                                           | 1.2                                    |
| Computer Science           | NA                                           | 3.9                                    |
| Multiple science majors    | NA                                           | 9.9                                    |
| Multiple STEM majors       | NA                                           | 2.6                                    |
| Non-STEM major             | NA                                           | 14.9                                   |
| Other STEM major           | NA                                           | 19.0                                   |

**Table S6.** Race/ethnicity, gender, and age demographic breakdown of science instructor participants.

| <b>Demographic</b> | <b>Identity</b>                                | <b>Percent (n)</b> |
|--------------------|------------------------------------------------|--------------------|
| Race/ethnicity     | White                                          | 76.20 (951)        |
|                    | Asian                                          | 9.62 (120)         |
|                    | Hispanic, Latino/a, or of Spanish origin       | 5.05 (63)          |
|                    | An identity not listed (including multiracial) | 2.72 (34)          |
|                    | Black or African American                      | 1.52 (19)          |
|                    | American Indian or Alaska Native               | 0.40 (5)           |
|                    | Pacific Islander                               | 0.16 (2)           |
|                    | Decline to state                               | 4.32 (54)          |
| Gender             | Man                                            | 54.57 (681)        |
|                    | Woman                                          | 42.63 (532)        |
|                    | Genderqueer or nonbinary                       | 0.40 (5)           |
|                    | An identity not listed                         | 0.08 (1)           |
|                    | Decline to state                               | 2.32 (29)          |
| Age                | 28-32                                          | 2.8 (35)           |
|                    | 33-37                                          | 15.06 (188)        |
|                    | 38-42                                          | 14.90 (186)        |
|                    | 43-49                                          | 21.15 (264)        |
|                    | 50-59                                          | 19.23 (240)        |
|                    | 60-69                                          | 15.54 (194)        |
|                    | 70+                                            | 4.25 (53)          |
|                    | Decline to state                               | 7.05 (88)          |

**Table S7.** Frequency for each reason to conceal a CSI was selected across all 10 CSIs out of all instances where an instructor reported a CSI and did not reveal the identity to all undergraduates (n=1414).

| <b>Reason to conceal identity</b>                                                                                                              | <b>Percent (n)</b> |
|------------------------------------------------------------------------------------------------------------------------------------------------|--------------------|
| I typically do not share my identity with others                                                                                               | 55.9 (791)         |
| I did not feel my identity was relevant to the course content                                                                                  | 54.2 (766)         |
| I had never thought about revealing my identity to all students in this course                                                                 | 46.7 (661)         |
| I did not feel my identity was relevant to the students in this course                                                                         | 40.8 (577)         |
| I thought revealing my identity to all undergraduates in this course was inappropriate                                                         | 39.5 (558)         |
| I did not feel like I had a personal enough relationship with the students in this course                                                      | 39.2 (554)         |
| I was concerned students would have a negative opinion about my identity                                                                       | 21.9 (309)         |
| I did not know others in the department, such as other faculty or instructors, who had revealed a similar identity to people in the department | 21.4 (302)         |
| I was concerned that revealing my identity would waste class time                                                                              | 16.1 (228)         |
| I was concerned that revealing my identity would result in poor course evaluations                                                             | 15.3 (217)         |
| I was concerned that I would be subjected to departmental disciplinary action for revealing my identity                                        | 6.9 (97)           |
| I was concerned I could be fired for revealing my identity                                                                                     | 4.0 (57)           |

**Table S8.** Frequency for each reason to reveal a CSI was selected across all 10 CSIs out of all instances where an instructor reported a CSI and revealed the identity to all undergraduates (n=228).

| <b>Reason to reveal identity</b>                                                                                                        | <b>Percent (n)</b> |
|-----------------------------------------------------------------------------------------------------------------------------------------|--------------------|
| I wanted to be an example to my students of someone who holds this identity                                                             | 80.3 (183)         |
| I wanted to be known as a supporter of individuals who also hold this identity                                                          | 69.3 (158)         |
| I felt that revealing my identity to students in this course was appropriate                                                            | 66.2 (151)         |
| I felt my identity was relevant to the students in this course                                                                          | 59.6 (136)         |
| I wanted to serve as a mentor to students with this identity                                                                            | 56.6 (129)         |
| I thought revealing my identity could make students more comfortable                                                                    | 50.4 (115)         |
| I thought revealing my identity could make me more relatable to students                                                                | 46.1 (105)         |
| I prefer to live authentically or be open with others about my identity                                                                 | 40.4 (92)          |
| I typically share my identity with people                                                                                               | 35.1 (80)          |
| I thought I could better engage students in the course material by making a connection between my identity and the course content       | 22.8 (52)          |
| I thought revealing my identity could help students understand me or my circumstances better                                            | 19.7 (45)          |
| I felt like I had a personal relationship with the students in the course                                                               | 18.9 (43)          |
| I felt my identity was relevant to the course content                                                                                   | 18.4 (42)          |
| I knew others in the department, such as other faculty or instructors, who have revealed a similar identity to people in the department | 5.7 (13)           |

**Dataset S1 (separate file available on GitHub).** For each CSI a participant reported, the extent to which they reveal that identity to undergraduates in the course they teach most often.

**Dataset S2. (separate file available on GitHub)** Summary of the prevalence of concealable stigmatized identities among instructors, whether they reveal their identity to all undergraduates in the course they teach most often, and the percent of undergraduates from a national sample who reported each identity.

**Dataset S3. (separate file available on GitHub)** For each CSI a participant reported, the combinations of reasons they selected as to why they reveal the identity from all undergraduates in the course they teach most often.

**Dataset S4. (separate file available on GitHub)** For each CSI a participant reported, the combinations of reasons they selected as to why they conceal the identity from all undergraduates in the course they teach most often.

**GitHub repository:** <https://github.com/carlybusch/Beyond-gender-and-race>

## Supplementary References

- Bahr, P. R., Jackson, G., McNaughtan, J., Oster, M., & Gross, J. (2017). Unrealized Potential: Community College Pathways to STEM Baccalaureate Degrees. *The Journal of Higher Education, 88*(3), 430–478. <https://doi.org/10.1080/00221546.2016.1257313>
- Barry, C. L., McGinty, E. E., Pescosolido, B. A., & Goldman, H. H. (2014). Stigma, discrimination, treatment effectiveness, and policy: Public views about drug addiction and mental illness. *Psychiatric Services, 65*(10), 1269–1272.
- Canning, E. A., LaCosse, J., Kroeper, K. M., & Murphy, M. C. (2020). Feeling Like an Imposter: The Effect of Perceived Classroom Competition on the Daily Psychological Experiences of First-Generation College Students. *Social Psychological and Personality Science, 11*(5), 647–657. <https://doi.org/10.1177/1948550619882032>
- Chaudoir, S. R., & Fisher, J. D. (2010). The disclosure processes model: Understanding disclosure decision making and postdisclosure outcomes among people living with a concealable stigmatized identity. *Psychological Bulletin, 136*(2), 236–256. <https://doi.org/10.1037/a0018193>
- Chaudoir, S. R., & Quinn, D. M. (2010). Revealing Concealable Stigmatized Identities: The Impact of Disclosure Motivations and Positive First-Disclosure Experiences on Fear of Disclosure and Well-Being: Revealing Concealable Stigmatized Identities. *Journal of Social Issues, 66*(3), 570–584. <https://doi.org/10.1111/j.1540-4560.2010.01663.x>
- Cooper, K. M., Gin, L. E., & Brownell, S. E. (2020). Depression as a concealable stigmatized identity: What influences whether students conceal or reveal their depression in undergraduate research experiences? *International Journal of STEM Education, 7*(1), 27. <https://doi.org/10.1186/s40594-020-00216-5>
- DeRoma, V. M., Leach, J. B., & Leverett, J. P. (2009). The relationship between depression and college academic performance. *College Student Journal, 43*(2), 325–335.



- Dika, S. L., & D'Amico, M. M. (2016). Early experiences and integration in the persistence of first-generation college students in STEM and non-STEM majors. *Journal of Research in Science Teaching*, 53(3), 368–383.
- England, B. J., Brigati, J. R., & Schussler, E. E. (2017). Student anxiety in introductory biology classrooms: Perceptions about active learning and persistence in the major. *PloS One*, 12(8), e0182506.
- England, B. J., Brigati, J. R., Schussler, E. E., & Chen, M. M. (2019). Student Anxiety and Perception of Difficulty Impact Performance and Persistence in Introductory Biology Courses. *CBE—Life Sciences Education*, 18(2), ar21. <https://doi.org/10/ggm8v>
- Harris, R. B., Mack, M. R., Bryant, J., Theobald, E. J., & Freeman, S. (2020). Reducing achievement gaps in undergraduate general chemistry could lift underrepresented students into a “hyperpersistent zone.” *Science Advances*, 6(24), eaaz5687.
- Henning, J. A., Ballen, C. J., Molina, S. A., & Cotner, S. (2019). Hidden Identities Shape Student Perceptions of Active Learning Environments. *Frontiers in Education*, 4, 129. <https://doi.org/10.3389/feduc.2019.00129>
- Hughes, B. E. (2018). Coming out in STEM: Factors affecting retention of sexual minority STEM students. *Science Advances*, 4(3), eaao6373. <https://doi.org/10.1126/sciadv.aao6373>
- Lakin, J. M., & Elliott, D. C. (2016). STEMing the shock: Examining transfer shock and its impact on STEM major and enrollment persistence. *Journal of the First-Year Experience & Students in Transition*, 28(2), 9–31.
- Maloy, J., Kwapisz, M. B., & Hughes, B. E. (2022). Factors Influencing Retention of Transgender and Gender Nonconforming Students in Undergraduate STEM Majors. *CBE—Life Sciences Education*, 21(1), ar13. <https://doi.org/10.1187/cbe.21-05-0136>
- Moon, N. W., Todd, R. L., Morton, D. L., & Ivey, E. (2012). Accommodating students with disabilities in science, technology, engineering, and mathematics (STEM). *Atlanta, GA:*

- Center for Assistive Technology and Environmental Access, Georgia Institute of Technology*, 8–21.
- Niu, L. (2017). Family socioeconomic status and choice of STEM major in college: An analysis of a national sample. *College Student Journal*, 51(2), 298–312.
- Ost, B. (2010). The role of peers and grades in determining major persistence in the sciences. *Economics of Education Review*, 29(6), 923–934.
- Quinn, D. M., & Chaudoir, S. R. (2009). Living with a concealable stigmatized identity: The impact of anticipated stigma, centrality, salience, and cultural stigma on psychological distress and health. *Journal of Personality and Social Psychology*, 97(4), 634–651.  
<https://doi.org/10.1037/a0015815>
- Quinn, D. M., & Earnshaw, V. A. (2011). Understanding Concealable Stigmatized Identities: The Role of Identity in Psychological, Physical, and Behavioral Outcomes: Concealable Stigmatized Identities. *Social Issues and Policy Review*, 5(1), 160–190.  
<https://doi.org/10.1111/j.1751-2409.2011.01029.x>
- Quinn, D. M., Williams, M. K., Quintana, F., Gaskins, J. L., Overstreet, N. M., Pishori, A., Earnshaw, V. A., Perez, G., & Chaudoir, S. R. (2014). Examining Effects of Anticipated Stigma, Centrality, Salience, Internalization, and Outness on Psychological Distress for People with Concealable Stigmatized Identities. *PLoS ONE*, 9(5), e96977.  
<https://doi.org/10.1371/journal.pone.0096977>
- Quinn, N., Wilson, A., MacIntyre, G., & Tinklin, T. (2009). ‘People look at you differently’: Students’ experience of mental health support within Higher Education. *British Journal of Guidance & Counselling*, 37(4), 405–418.  
<https://doi.org/10.1080/03069880903161385>
- Rattermann, M. J. (2014). Measuring the impact of substance abuse on student academic achievement and academic growth. *Advances in School Mental Health Promotion*, 7(2), 123–135.

Seymour, E. (1995). Guest comment: Why undergraduates leave the sciences. *American Journal of Physics*, 63(3), 199–202.

Seymour, E., & Hewitt, N. M. (1997). *Talking about leaving*. Westview Press, Boulder, CO.

Trans Legislation Tracker. (2023). *Tracking the rise of anti-trans bills in the U.S.* Trans Legislation Tracker. <https://translegislation.com/learn>
